# Supplementary material for: Covalent Grafting of Eosin Y to the Giant Keplerate {Mo132} through an Organosilicon Linker in Homogeneous Regime
Source: MDPI journal article supplement (doi:10.3390/inorganics11060239), 2023-05-30
Supplement: s1 [file s1]

## Supporting Information

# Covalent grafting of Eosin Y to the giant Keplerate {Mo<sub>132</sub>} through an organosilicon linker in homogeneous regime

Andrey Denikaev <sup>1</sup>, Grigory Kim <sup>1,2</sup>, Evgeny Greshnyakov <sup>1</sup>, Nikolai Moskalenko <sup>3</sup>  
and Kirill Grzhegorzhevskii <sup>1,2,\*</sup>

<sup>1</sup> Ural Federal University, 620002, Mira St. 19, Ekaterinburg, Russia; andrejdenikaev@gmail.com (A.D.), kim-g@ios.uran.ru (G.K.), evgeny.greshnyakov@urfu.ru (E.G.) and kirillvalentinovich@urfu.ru (K.G.);

<sup>2</sup> I. Ya. Postovsky Institute of Organic Synthesis of the Ural Branch of RAS, 22/20 S. Kovalevskoy/Akademicheskaya St., Ekaterinburg 62099, Russia; kim-g@ios.uran.ru (G.K.) and kirillvalentinovich@urfu.ru (K.G.);

<sup>3</sup> Institute of High Temperature Electrochemistry of the Ural Branch of RAS, 22 S. Kovalevskoy St./ 20 Akademicheskaya St., Ekaterinburg, 620066 Russia; moskalenko.nikol@yandex.ru (N.M.);

\* Correspondence: kirillvalentinovich@urfu.ru (K.G.)

## Content

|                                                          |   |
|----------------------------------------------------------|---|
| 1. IR spectroscopy .....                                 | 2 |
| 2. <sup>1</sup> H NMR, CD <sub>3</sub> CN, 500 MHz ..... | 3 |
| 3. UV-Vis, Fluorescence .....                            | 6 |

## 1. IR spectroscopy

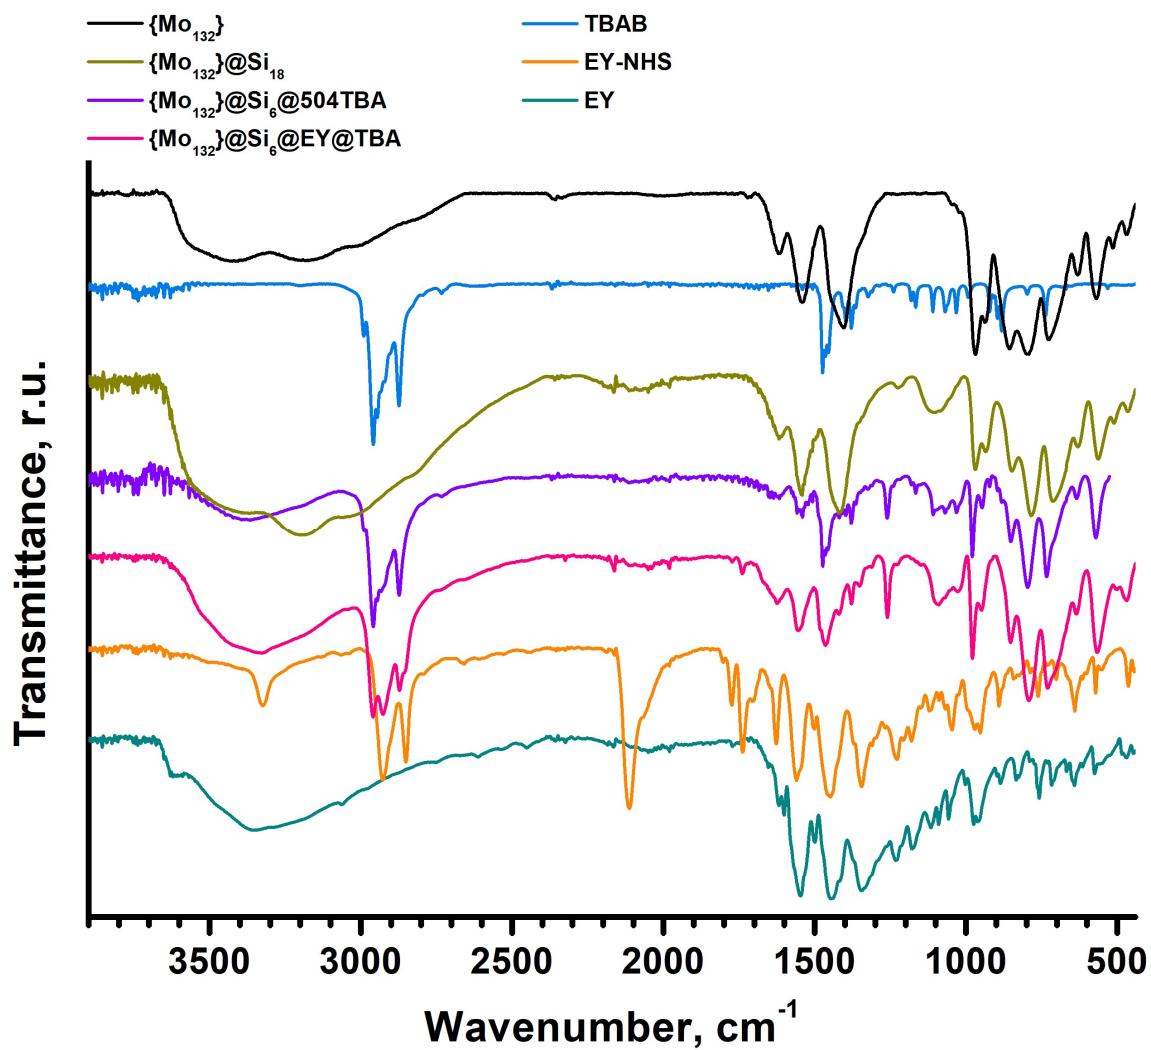

**Figure S1.** IR spectra measured in the ATR mode (from the bottom to the top): EY, EY-NHS,  $\{Mo_{132}\}@Si_6@EY@TBA$ ,  $\{Mo_{132}\}@Si_6@504TBA$ ,  $\{Mo_{132}\}@Si_{18}$ , TBAB, and  $\{Mo_{132}\}$ .

## 2. $^1\text{H}$ NMR, $\text{CD}_3\text{CN}$ , 500 MHz

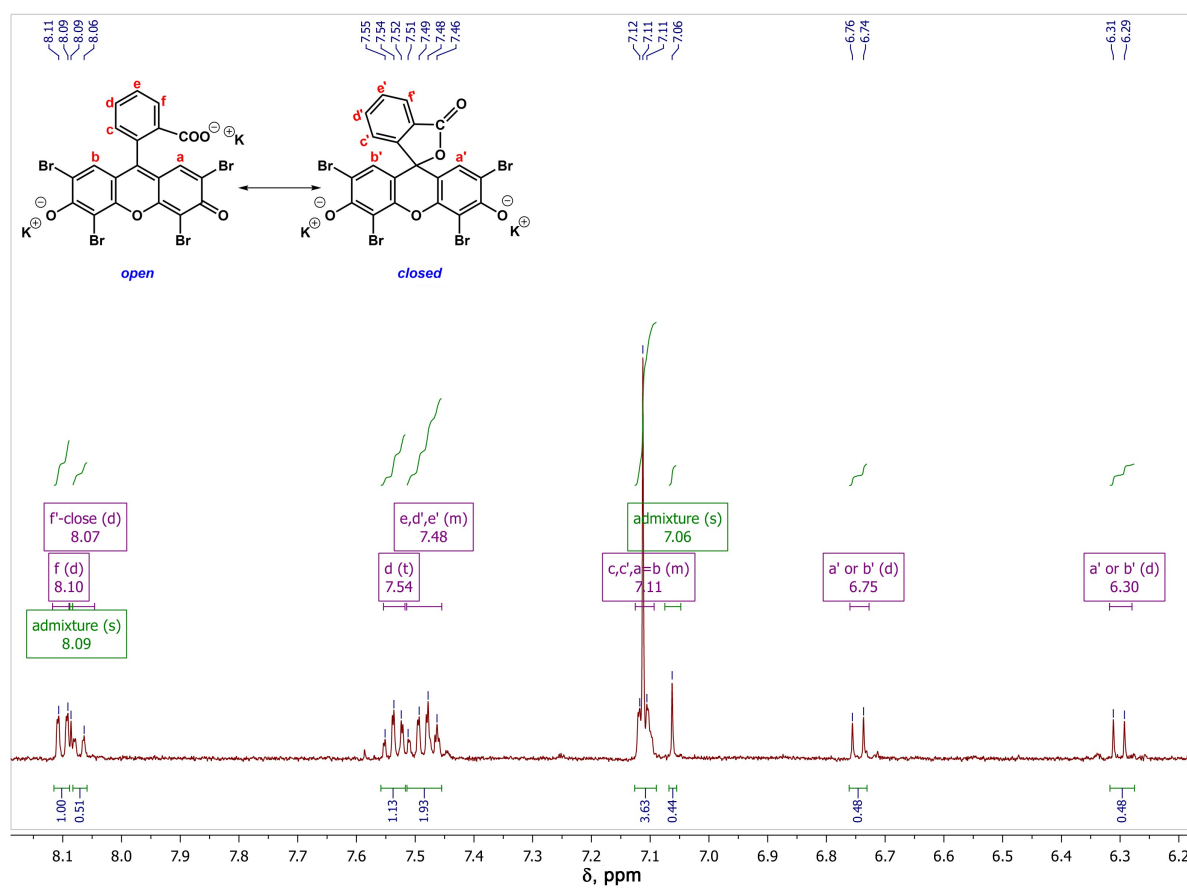

**Figure S2.**  $^1\text{H}$  NMR spectrum (in  $\text{CD}_3\text{CN}$ ) of the EY dipotassium salt.

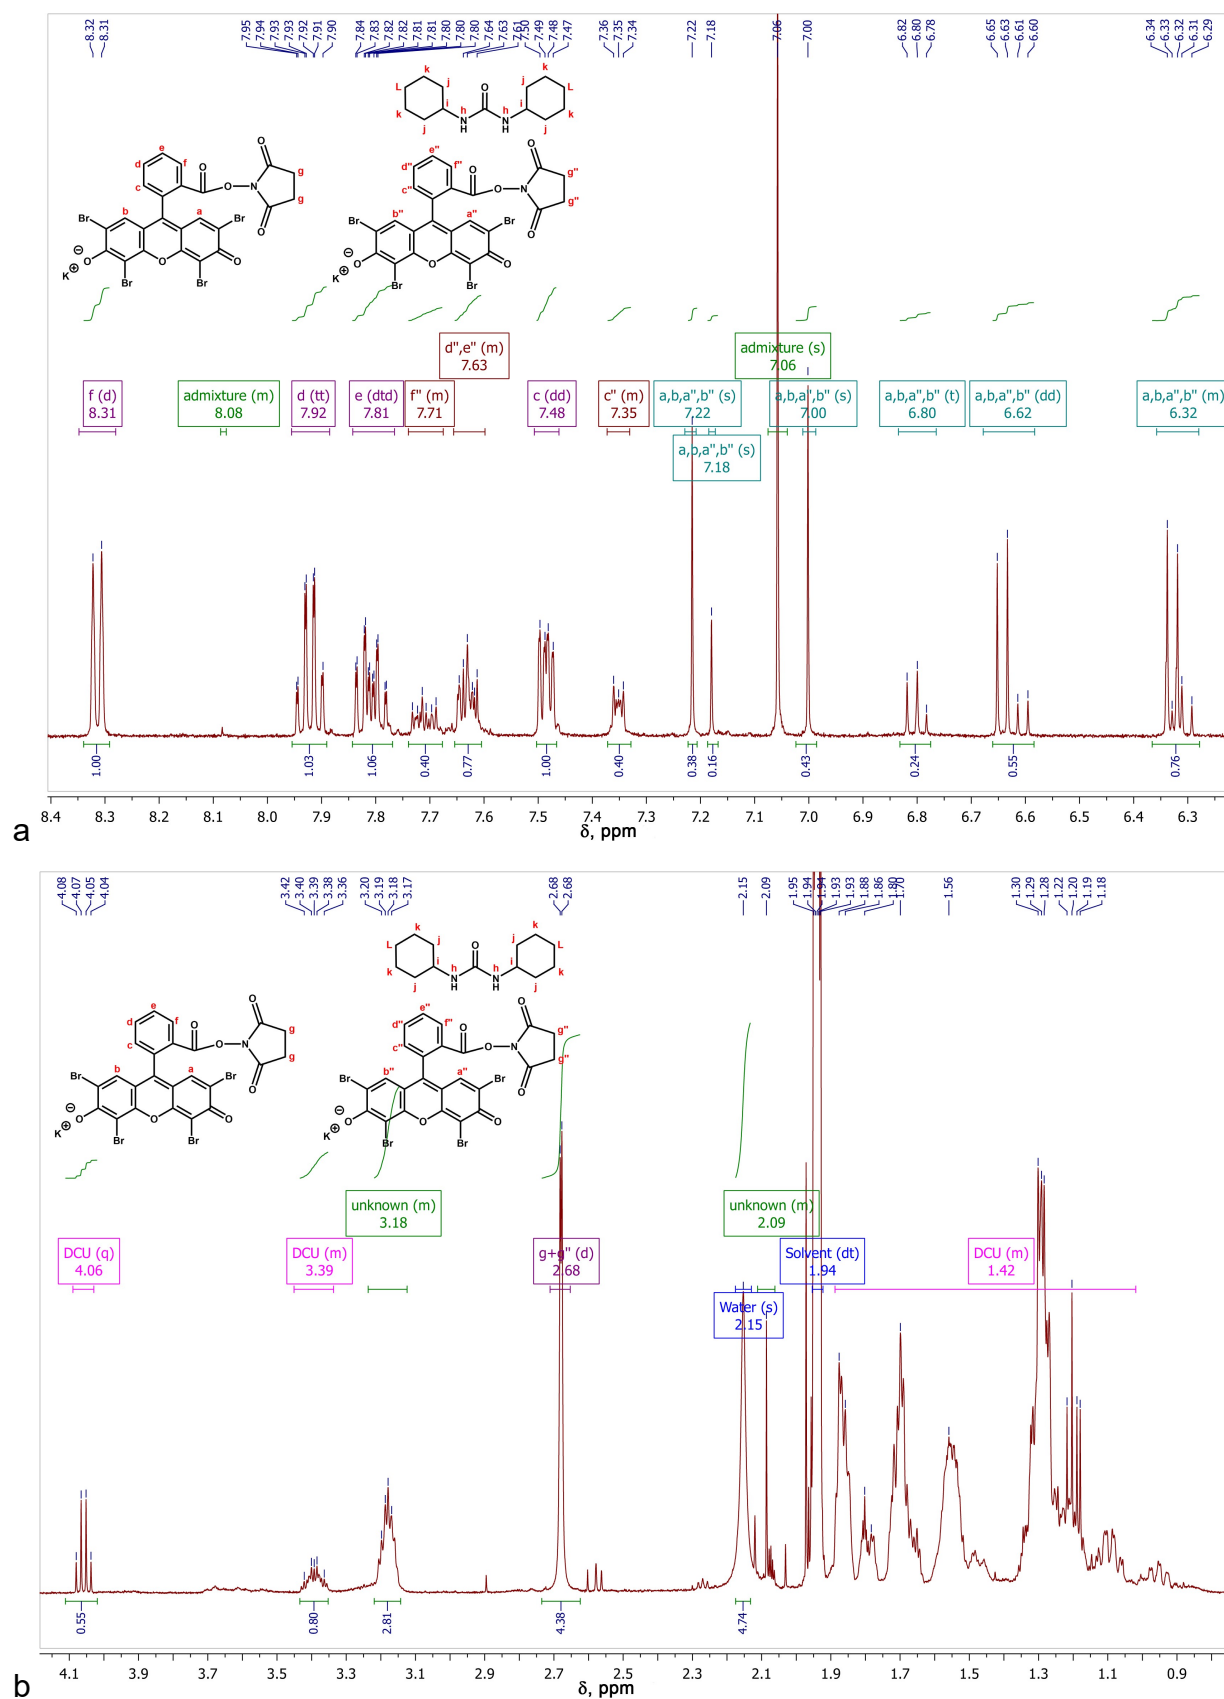

**Figure S3.**  $^1\text{H}$  NMR spectrum (in  $\text{CD}_3\text{CN}$ ) of the EY-NHS potassium salt.

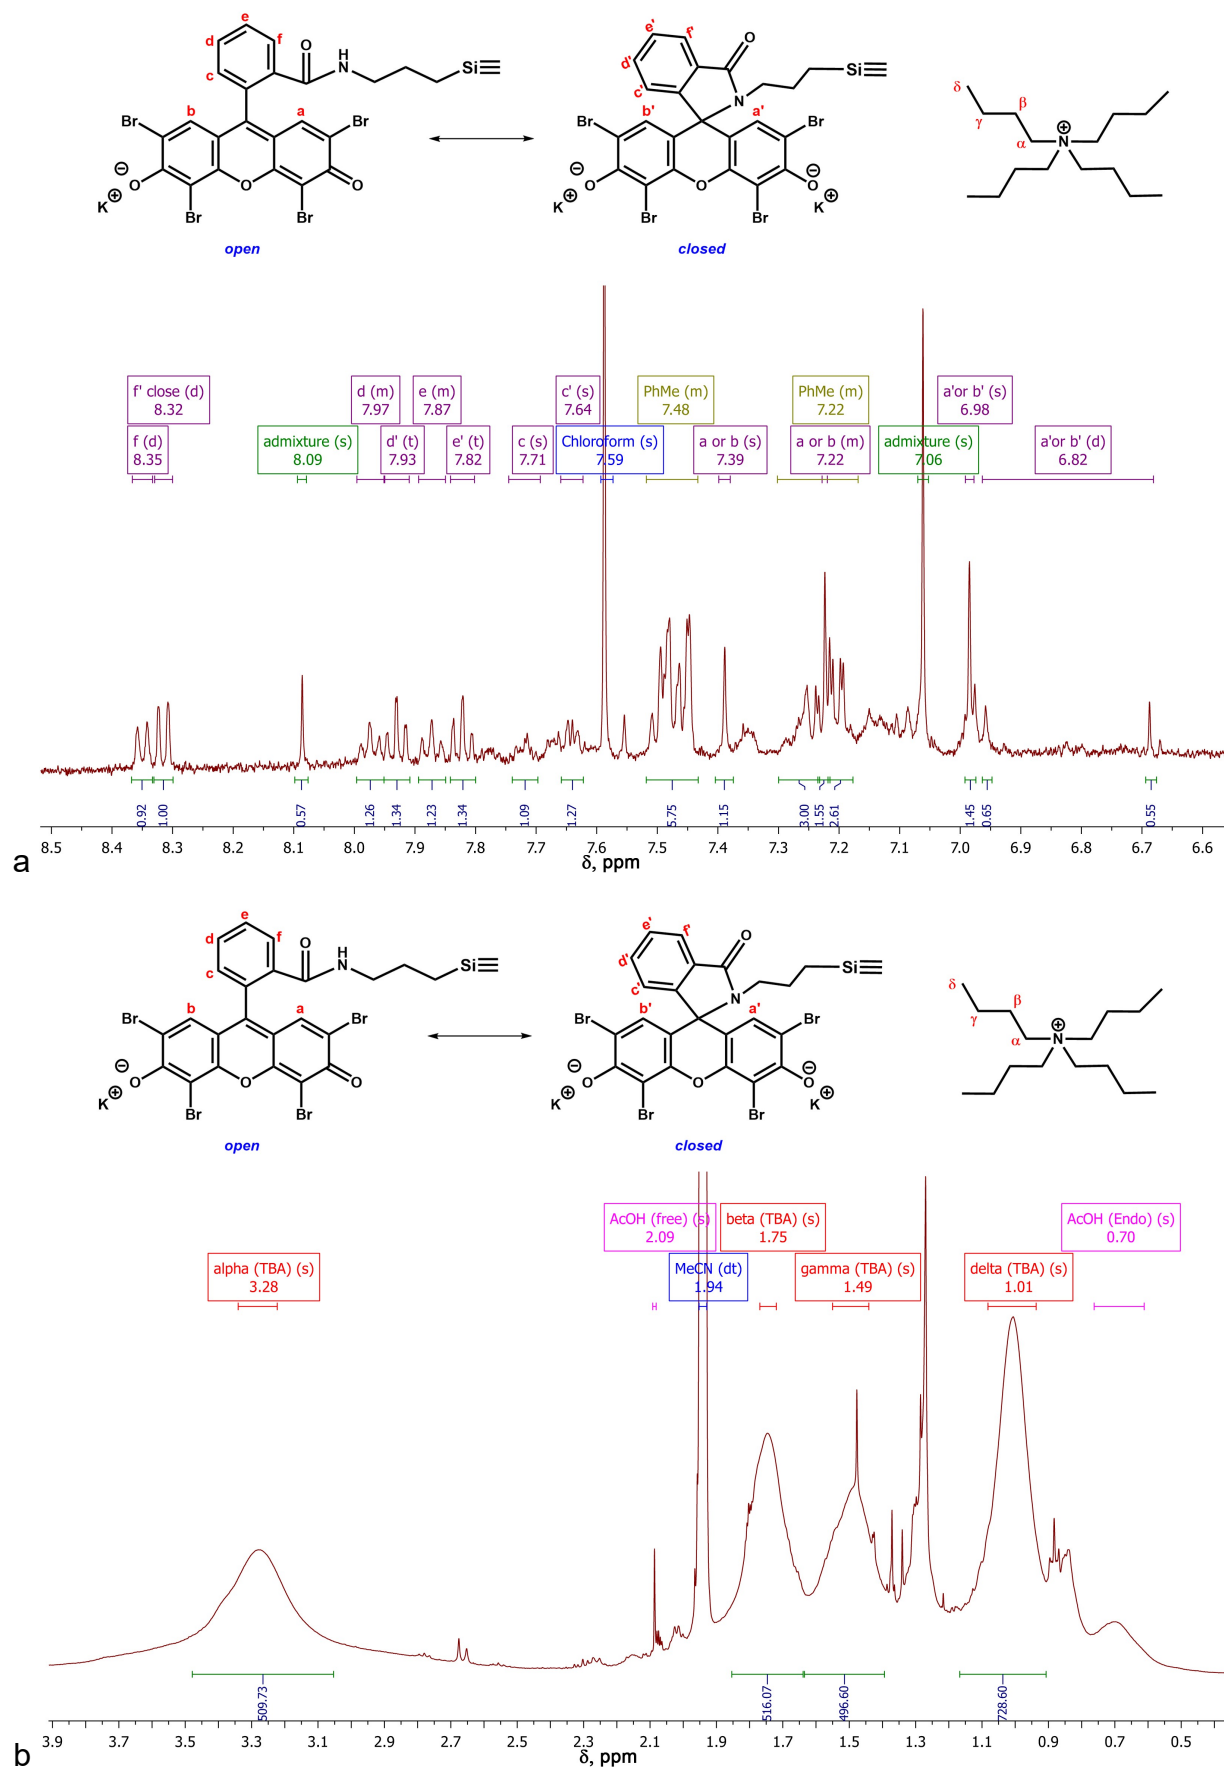

### 3. UV-Vis, Fluorescence

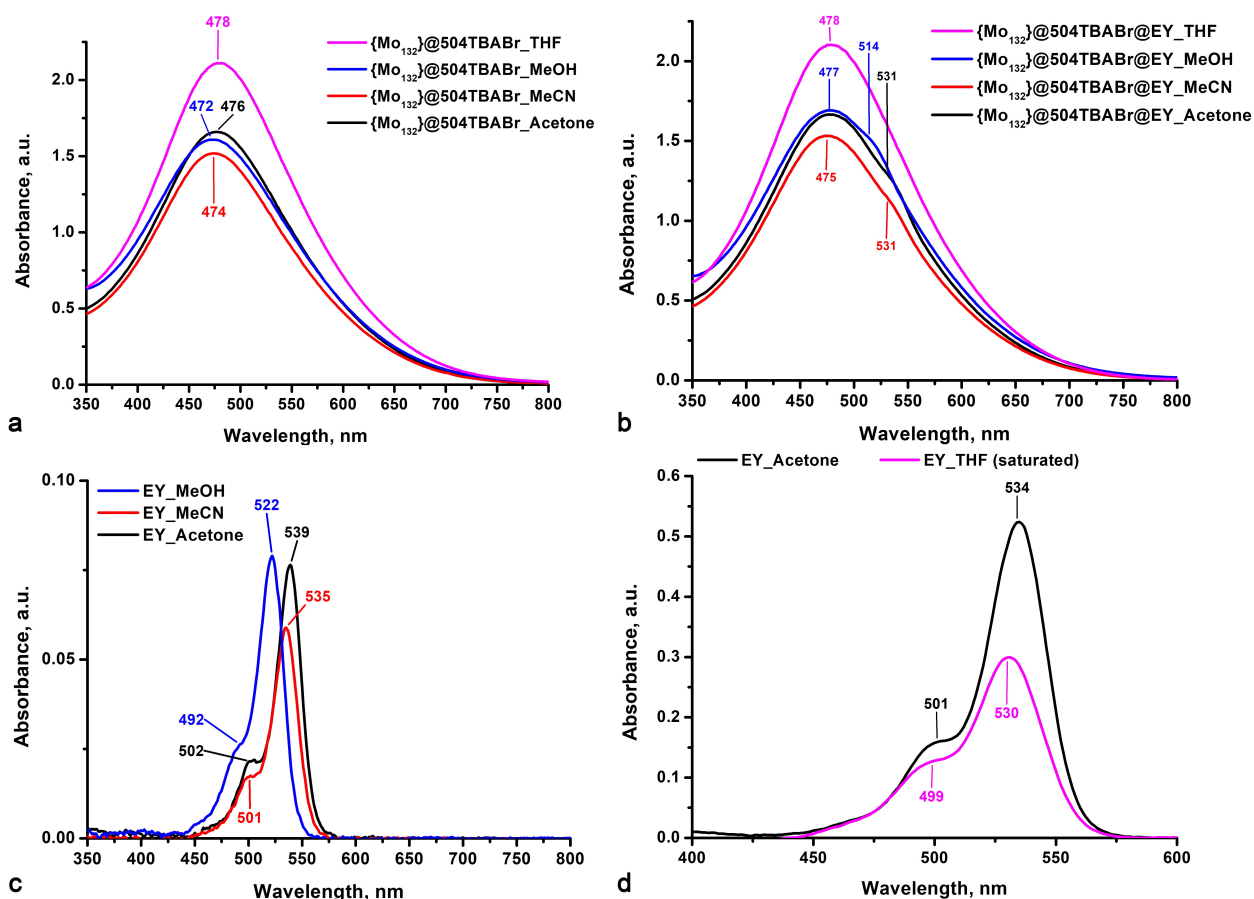

**Figure S5.** (a) UV-Vis spectra of TBA salt of  $\{Mo_{132}\}$  produced through extraction to chloroform contained 504 fold molar excess of TBABr –  $\{Mo_{132}\}@504TBA$  – in series of organic solvents; (b) UV-Vis spectra of equimolar mixture of  $\{Mo_{132}\}@504TBA$  and EY in series of organic solvents; (c, d) UV-Vis spectra of EY (constant concentration) in series of organic solvents. In (d) the EY concentration is the same for acetone and THF solution.

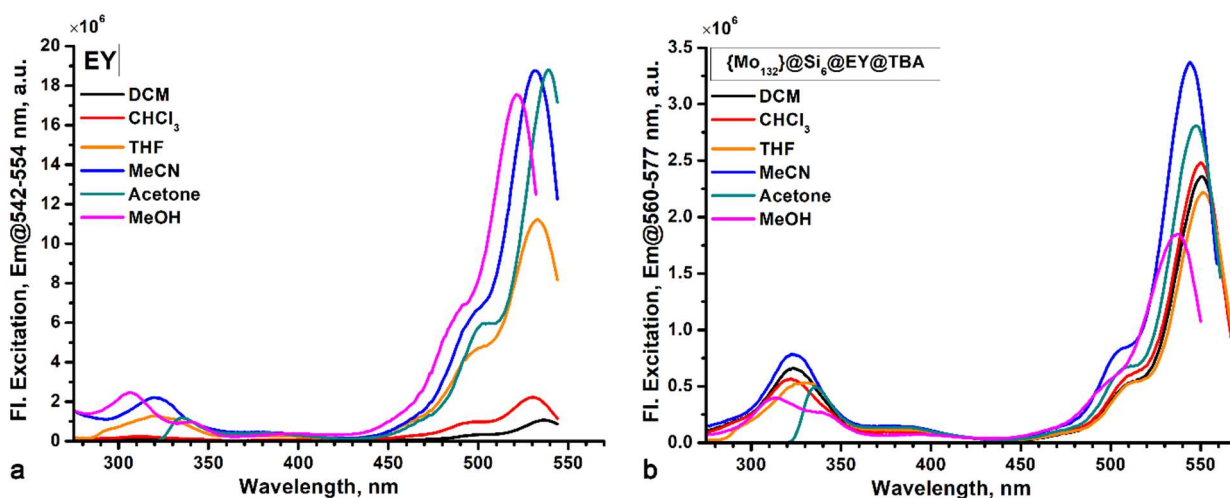

**Figure S6.** The fluorescence excitation spectra of EY and  $\{Mo_{132}\}@Si_6@EY@TBA$  measured in series of organic solvents.

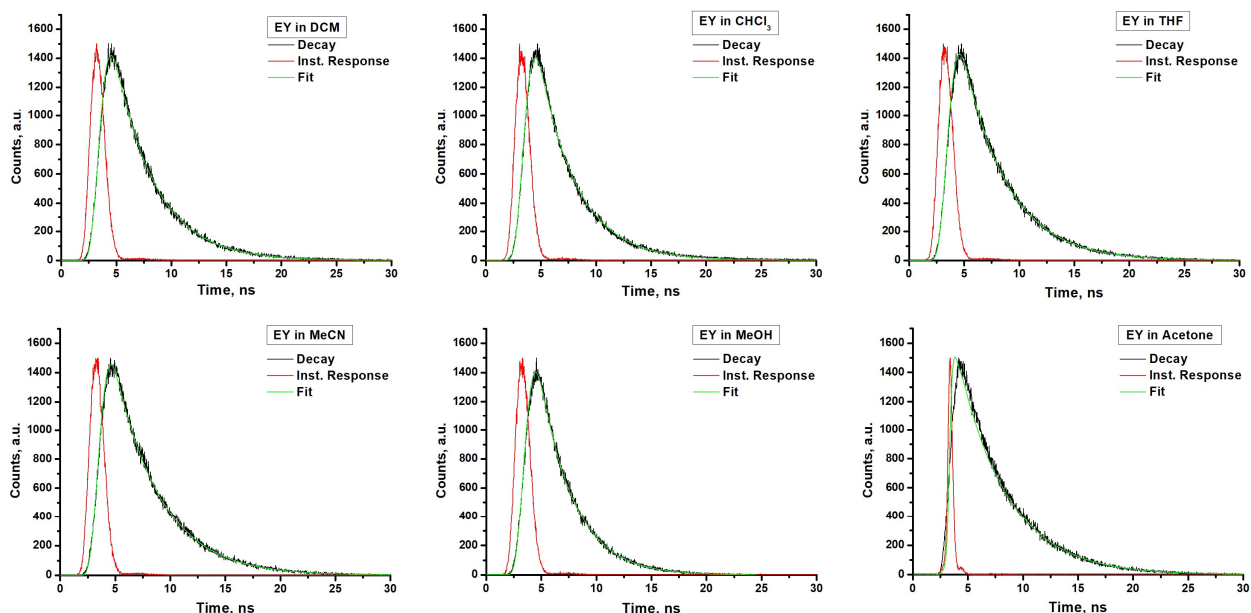

**Figure S7.** Time-resolved fluorescence decay spectra of EY in series of organic solvents.

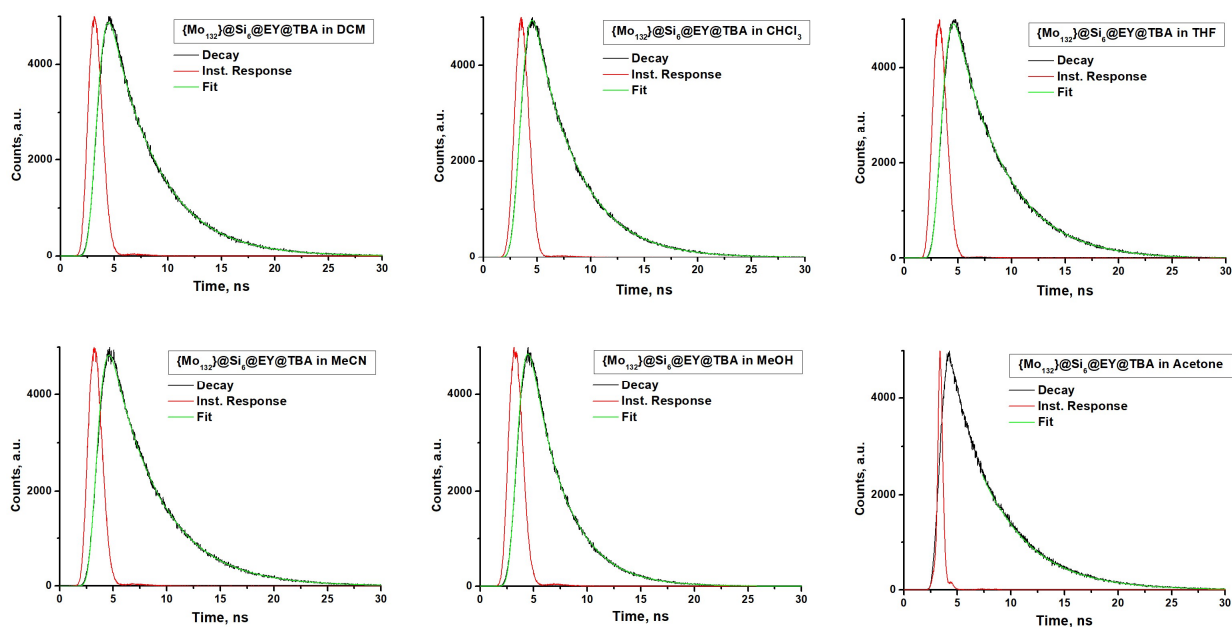

**Figure S8.** Time-resolved fluorescence decay spectra of  $\{\text{Mo}_{132}\}@\text{Si}_6@\text{EY}@\text{TBA}$  in series of organic solvents.
